# Supplementary material for: Maternal Risk of Cardiovascular Disease After Use of Assisted Reproductive Technologies
Source: PubMed Central journal article supplement (PMC10413220; doi:10.1001/jamacardio.2023.2324), 2023-08-09
Supplement: jamacardiol-e232324-s001.pdf [file jamacardiol-e232324-s001.pdf]

## Supplementary Online Content

Magnus MC, Fraser A, Håberg SE, et al. Maternal risk of cardiovascular disease after use of assisted reproductive technologies. *JAMA Cardiol*. Published online August 9, 2023. doi:10.1001/jamacardio.2023.2324

**eTable 1.** Terms Related to Assisted Reproductive Technologies

**eTable 2.** *International Classification of Diseases* Codes Used to Capture Cardiovascular Disease

**eTable 3.** Background Characteristics According to Country

**eTable 4.** Risk of Any Cardiovascular Disease According to Conception by Assisted Reproductive Technologies

**eTable 5.** Risk of Subgroups of Cardiovascular Disease According to Conception by Assisted Reproductive Technologies

**eTable 6.** Exploring Sources of Heterogeneity in the Risk of Cardiovascular Disease According to Conception by Assisted Reproductive Technologies by Excluding One Country in Turn

**eTable 7.** Sensitivity Analysis of the Risk of Cardiovascular Disease According to Conception by Assisted Reproductive Technologies Adjusting for Tobacco Use and Body Mass Index

**eTable 8.** Sensitivity Analysis of the Risk of Cardiovascular Disease According to Conception by Assisted Reproductive Technologies Adjusting for Education

**eTable 9.** Risk of Any Cardiovascular Disease According to Conception by Assisted Reproductive Technologies Excluding Pulmonary Embolism and Deep Vein Thrombosis From the Outcome Definition

**eTable 10.** Risk of Subgroups of Cardiovascular Disease According to Conception by Assisted Reproductive Technologies Also Including Parous Women at the Start of Follow-up

**eTable 11.** Stratified Analysis of the Risk of Cardiovascular Disease According to Conception by Assisted Reproductive Technologies by Year of Start of Follow-up

This supplementary material has been provided by the authors to give readers additional information about their work.

eTable 1 Terms related to assisted reproductive technologies

| Term                                     | Definition <sup>a</sup>                                                                                                                                                                                                                                                                                                                                                                                                                                                                                        |
|------------------------------------------|----------------------------------------------------------------------------------------------------------------------------------------------------------------------------------------------------------------------------------------------------------------------------------------------------------------------------------------------------------------------------------------------------------------------------------------------------------------------------------------------------------------|
| Assisted reproductive technologies (ART) | All interventions that include the in vitro handling of both human oocytes and sperm or of embryos for the purpose of reproduction. This includes, but is not limited to, in vitro fertilization (IVF) and embryo transfer, intracytoplasmic sperm injection (ICSI), embryo biopsy, preimplantation genetic testing, assisted hatching, gamete intrafallopian transfer, zygote intrafallopian transfer, gamete and embryo cryopreservation, semen, oocyte and embryo donation, and gestational carrier cycles. |
| Frozen embryo transfer (FET) cycle       | An ART procedure in which cycle monitoring is carried out with the intention of transferring to a woman, frozen/thawed or vitrified/warmed embryo(s)/blastocyst(s). Note: A FET cycle is initiated when specific medication is provided or cycle monitoring is started in the female recipient with the intention to transfer an embryo.                                                                                                                                                                       |
| In vitro fertilization (IVF)             | A sequence of procedures that involves extracorporeal fertilization of gametes. It includes conventional in vitro insemination and ICSI.                                                                                                                                                                                                                                                                                                                                                                       |
| Intracytoplasmic sperm injection (ICSI)  | A procedure in which a single spermatozoon is injected into the oocyte cytoplasm.                                                                                                                                                                                                                                                                                                                                                                                                                              |

<sup>a</sup> The definitions are taken from the International Glossary on Infertility and Fertility Care, published in Human Reproduction by Zegers-Hochschild et. al in 2017.

eTable 2 International classification of diseases codes used to capture cardiovascular disease

|                         | Version 10         | Version 9    | Version 8    |
|-------------------------|--------------------|--------------|--------------|
| Ischemic heart disease  | I20-I25            | 410-414      | 410-414      |
| Cerebrovascular disease | I60-I69            | 430-438      | 430-438      |
| Myocardial infarction   | I21, I22           | 410          | 410          |
| Stroke                  | I60, I61, I63, I64 | 430-434, 436 | 430-434, 436 |
| Cardiomyopathy          | I42, I43           | 425          | 425          |
| Heart failure           | I50                | 428          | 428          |
| Pulmonary embolism      | I26                | 415B         | 450          |
| Deep vein thrombosis    | I80, I82           | 451, 453     | 451, 453     |

eTable 3 Background characteristics according to country

| Background characteristics                              | Denmark<br>(n= 533,111 women) | Finland<br>(n= 572,726 women) | Norway<br>(n= 170,478 women) | Sweden<br>(n= 1,220,126 women) |
|---------------------------------------------------------|-------------------------------|-------------------------------|------------------------------|--------------------------------|
| <b>Age at start of follow-up, mean(SD)</b>              | 29.6 (4.7)                    | 28.9 (5.1)                    | 30.0 (5.1)                   | 29.1 (5.0)                     |
| <b>Number of years of follow-up median (IQR)</b>        | 10 (5, 15)                    | 12 (6, 19)                    | 3 (2, 5)                     | 13 (6, 21)                     |
| <b>Parity at end of follow-up, N(%)</b>                 |                               |                               |                              |                                |
| 1                                                       | 152,497 (28.6)                | 162,454 (28.4)                | 77,661 (45.6)                | 307,146 (25.2)                 |
| 2                                                       | 274,172 (51.4)                | 261,617 (45.7)                | 78,831 (46.2)                | 638,097 (52.3)                 |
| 3                                                       | 85,169 (16.0)                 | 105,760 (18.5)                | 12,664 (7.4)                 | 215,580 (17.7)                 |
| 4 or higher                                             | 21,273 (4.0)                  | 42,895 (7.5)                  | 1,322 (0.8)                  | 59,303 (4.9)                   |
| <b>Used ART during follow-up, N(%)</b>                  |                               |                               |                              |                                |
| No                                                      | 505,670 (94.9)                | 552,994 (96.6)                | 162,449 (95.3)               | 1,177,854 (96.5)               |
| Yes                                                     | 27,441 (5.2)                  | 19,732 (3.5)                  | 8,029 (4.7)                  | 42,272 (3.5)                   |
| <b>Pre-pregnancy body-mass index, N(%)</b>              |                               |                               |                              |                                |
| Underweight (<18.5 kg/m <sup>2</sup> )                  | 11,527 (2.2)                  | 9,904 (1.7)                   | 4,526 (2.7)                  | 36,469 (3.0)                   |
| Normal weight (18.5-24.9 kg/m <sup>2</sup> )            | 160,356 (30.1)                | 150,355 (26.3)                | 58,159 (34.1)                | 667,362 (54.7)                 |
| Overweight (25-29.9 kg/m <sup>2</sup> )                 | 49,759 (9.3)                  | 47,581 (8.3)                  | 19,014 (11.2)                | 211,026 (17.3)                 |
| Obesity (≥30 kg/m <sup>2</sup> )                        | 27,308 (5.1)                  | 24,589 (4.3)                  | 10,102 (5.9)                 | 83,051 (6.8)                   |
| Missing                                                 | 284,161 (53.3)                | 340,297 (59.4)                | 78,677 (46.2)                | 222,218 (18.2)                 |
| <b>Tobacco use at start of follow-up, N(%)</b>          |                               |                               |                              |                                |
| No                                                      | 412,150 (77.3)                | 468,753 (81.9)                | 128,506 (75.4)               | 1,015,911 (83.3)               |
| Yes                                                     | 77,820 (14.6)                 | 94,413 (16.5)                 | 16,508 (9.7)                 | 149,341 (12.2)                 |
| Missing                                                 | 43,141 (8.1)                  | 9,560 (1.7)                   | 25,464 (14.9)                | 54,874 (4.5)                   |
| <b>Diabetes at start of follow-up, N(%)</b>             |                               |                               |                              |                                |
| No                                                      | 530,215 (99.5)                | 569,205 (99.4)                | 169,074 (99.2)               | 1,213,837 (99.5)               |
| Yes                                                     | 2,896 (0.5)                   | 3,521 (0.6)                   | 1,404 (0.8)                  | 6,299 (0.5)                    |
| <b>Chronic hypertension at start of follow-up, N(%)</b> |                               |                               |                              |                                |
| No                                                      | 528,637 (99.2)                | 563,580 (98.4)                | 169,634 (99.5)               | 1,213,549 (99.5)               |
| Yes                                                     | 4,474 (0.8)                   | 9,146 (1.6)                   | 844 (0.5)                    | 6,577 (0.5)                    |
| <b>PCOS, N(%)</b>                                       |                               |                               |                              |                                |
| No                                                      | 528,787 (99.2)                | 570,056 (99.5)                | 167,890 (98.5)               | 1,211,763 (99.3)               |
| Yes                                                     | 4,324 (0.8)                   | 2,670 (0.5)                   | 2,588 (1.5)                  | 8,363 (0.7)                    |
| <b>Highest obtained educational level, N(%)</b>         |                               |                               |                              |                                |
| Primary/secondary                                       | 308,418 (57.9)                | 224,046 (39.1)                | NA                           | 634,994 (52.0)                 |

|                                                                                                              |                |                |                |                  |
|--------------------------------------------------------------------------------------------------------------|----------------|----------------|----------------|------------------|
| Short tertiary/bachelor                                                                                      | 143,382 (26.9) | 191,249 (33.4) | NA             | 347,294 (28.5)   |
| Long tertiary/master or higher                                                                               | 69,736 (13.1)  | 104,006 (18.2) | NA             | 165,879 (13.6)   |
| Missing                                                                                                      | 11,575 (2.2)   | 53,425 (9.3)   | NA             | 71,960 (5.9)     |
| <b>Any preterm birth by end of follow-up, N(%)</b>                                                           |                |                |                |                  |
| No                                                                                                           | 477,343 (89.5) | 517,835 (90.4) | 155,504 (91.2) | 1,097,653 (90.0) |
| Yes                                                                                                          | 55,768 (10.5)  | 54,891 (9.6)   | 14,974 (8.8)   | 122,473 (10.0)   |
| <b>Any small-gestational-age delivery by end of follow-up, N(%)</b>                                          |                |                |                |                  |
| No                                                                                                           | 491,998 (92.3) | 533,149 (93.1) | 159,841 (93.8) | 1,137,816 (93.3) |
| Yes                                                                                                          | 41,114 (7.7)   | 39,577 (6.9)   | 10,637 (6.2)   | 82,310 (6.8)     |
| <b>Any stillbirth by end of follow-up, N(%)</b>                                                              |                |                |                |                  |
| No                                                                                                           | 528,876 (99.2) | 568,863 (99.3) | 169,049 (99.2) | 1,211,792 (99.3) |
| Yes                                                                                                          | 4,235 (0.8)    | 3,863 (0.7)    | 1,429 (0.8)    | 8,334 (0.7)      |
| <b>Any history of pregnancy complicated by hypertensive disorders of pregnancy by end of follow-up, N(%)</b> |                |                |                |                  |
| No                                                                                                           | 495,122 (92.9) | 508,727 (88.8) | 157,042 (92.1) | 1,133,867 (92.9) |
| Yes                                                                                                          | 37,989 (7.1)   | 63,999 (11.2)  | 13,436 (7.9)   | 86,259 (7.1)     |
| <b>Any multiple birth by end of follow-up, N(%)</b>                                                          |                |                |                |                  |
| No                                                                                                           | 511,377 (95.9) | 555,001 (96.9) | 165,891 (97.3) | 1,185,455 (97.2) |
| Yes                                                                                                          | 21,734 (4.1)   | 17,725 (3.1)   | 4,587 (2.7)    | 34,671 (2.8)     |

eTable 4 Risk of any cardiovascular disease according to conception by assisted reproductive technologies

| Country  | Exposure | N follow-up time in years | N events | Age and calendar year adjusted HR (95% CI) | Adjusted <sup>a</sup> HR (95% CI) | Adjusted <sup>b</sup> HR (95% CI) |
|----------|----------|---------------------------|----------|--------------------------------------------|-----------------------------------|-----------------------------------|
| Combined | Non-ART  | 28,047,283                | 42,685   | Ref                                        | Ref                               | Ref                               |
|          | ART      | 691,679                   | 1,303    | 1.04 (0.99-1.10)                           | 0.97 (0.91-1.02)                  | 0.96 (0.91-1.02)                  |
| Denmark  | Non-ART  | 5,014,338                 | 13,518   | Ref                                        | Ref                               | Ref                               |
|          | ART      | 193,761                   | 591      | 1.01 (0.93-1.10)                           | 0.98 (0.90-1.06)                  | 0.97 (0.89-1.06)                  |
| Finland  | Non-ART  | 6,607,191                 | 14,348   | Ref                                        | Ref                               | Ref                               |
|          | ART      | 157,125                   | 426      | 1.10 (1.00-1.21)                           | 1.09 (0.99-1.20)                  | 1.07 (0.96-1.18)                  |
| Norway   | Non-ART  | 544,702                   | 676      | Ref                                        | Ref                               | Ref                               |
|          | ART      | 24,560                    | 28       | 0.76 (0.52-1.11)                           | 0.74 (0.50-1.09)                  | 0.73 (0.49-1.07)                  |
| Sweden   | Non-ART  | 15,881,052                | 14,143   | Ref                                        | Ref                               | Ref                               |
|          | ART      | 316,231                   | 258      | 0.88 (0.78-1.00)                           | 0.84 (0.74-0.95)                  | 0.83 (0.73-0.95)                  |

<sup>a</sup> Adjusted for age, parity, polycystic ovarian syndrome, diabetes, chronic hypertension, year of start of follow-up, in addition to country (in the combined model).

<sup>b</sup> Adjusted for age, parity, polycystic ovarian syndrome, diabetes, chronic hypertension, year of start of follow-up, country (in the combined model), multiple gestation, preterm birth, small-for-gestational-age birth, stillbirth and hypertensive disorders of pregnancy.

eTable 5 Risk of subgroups of cardiovascular disease according to conception by assisted reproductive technologies

| Outcome                 | Country  | Exposure   | N follow-up time in years | N events         | Age and calendar year adjusted HR (95% CI) | Adjusted <sup>a</sup> HR (95% CI) | Adjusted <sup>b</sup> HR (95% CI) |
|-------------------------|----------|------------|---------------------------|------------------|--------------------------------------------|-----------------------------------|-----------------------------------|
| Ischemic heart disease  | Combined | Non-ART    | 28,230,865                | 10,019           | Ref                                        | Ref                               | Ref                               |
|                         |          | ART        | 695,886                   | 370              | 1.03 (0.93-1.15)                           | 0.90 (0.81-1.01)                  | 0.91 (0.81-1.02)                  |
|                         | Denmark  | Non-ART    | 5,062,995                 | 3,985            | Ref                                        | Ref                               | Ref                               |
|                         |          | ART        | 195,374                   | 221              | 1.08 (0.94-1.24)                           | 1.02 (0.88-1.17)                  | 1.05 (0.90-1.21)                  |
|                         | Finland  | Non-ART    | 6,699,191                 | 2,500            | Ref                                        | Ref                               | Ref                               |
|                         |          | ART        | 158,718                   | 76               | 0.89 (0.71-1.13)                           | 0.88 (0.70-1.12)                  | 0.84 (0.66-1.06)                  |
|                         | Norway   | Non-ART    | 545,963                   | 80               | Ref                                        | Ref                               | Ref                               |
|                         |          | ART        | 24,612                    | <5               | 0.57 (0.21-1.59)                           | 0.44 (0.15-1.29)                  | 0.43 (0.15-1.26)                  |
| Sweden                  | Non-ART  | 15,952,715 | 3,454                     | Ref              | Ref                                        | Ref                               |                                   |
|                         | ART      | 317,182    | 69                        | 0.87 (0.68-1.11) | 0.79 (0.62-1.01)                           | 0.78 (0.61-1.01)                  |                                   |
| Myocardial Infarction   | Combined | Non-ART    | 28,263,749                | 3,412            | Ref                                        | Ref                               | Ref                               |
|                         |          | ART        | 697,249                   | 97               | 0.91 (0.74-1.12)                           | 0.80 (0.65-0.99)                  | 0.82 (0.66-1.02)                  |
|                         | Denmark  | Non-ART    | 5,077,871                 | 807              | Ref                                        | Ref                               | Ref                               |
|                         |          | ART        | 196,233                   | 41               | 1.03 (0.74-1.42)                           | 0.93 (0.67-1.29)                  | 0.98 (0.70-1.38)                  |
|                         | Finland  | Non-ART    | 6,677,773                 | 647              | Ref                                        | Ref                               | Ref                               |
|                         |          | ART        | 158,987                   | 21               | 0.95 (0.61-1.49)                           | 0.92 (0.59-1.44)                  | 0.94 (0.60-1.49)                  |
|                         | Norway   | Non-ART    | 546,073                   | 27               | Ref                                        | Ref                               | Ref                               |
|                         |          | ART        | 24,617                    | <5               | 0.40 (0.05-2.99)                           | 0.33 (0.04-2.71)                  | 0.32 (0.04-2.57)                  |
| Sweden                  | Non-ART  | 15,962,032 | 1,931                     | Ref              | Ref                                        | Ref                               |                                   |
|                         | ART      | 317,412    | 34                        | 0.78 (0.55-1.10) | 0.71 (0.50-1.00)                           | 0.69 (0.48-0.99)                  |                                   |
| Cerebrovascular disease | Combined | Non-ART    | 28,210,371                | 12,850           | Ref                                        | Ref                               | Ref                               |
|                         |          | ART        | 695,806                   | 387              | 1.05 (0.94-1.16)                           | 0.97 (0.87-1.07)                  | 0.97 (0.87-1.08)                  |
|                         | Denmark  | Non-ART    | 5,062,184                 | 3,792            | Ref                                        | Ref                               | Ref                               |
|                         |          | ART        | 195,529                   | 175              | 1.09 (0.93-1.27)                           | 1.03 (0.88-1.20)                  | 1.03 (0.87-1.21)                  |
|                         | Finland  | Non-ART    | 6,661,938                 | 3,907            | Ref                                        | Ref                               | Ref                               |
|                         |          | ART        | 158,554                   | 119              | 1.09 (0.90-1.32)                           | 1.07 (0.89-1.29)                  | 1.08 (0.89-1.31)                  |
|                         | Norway   | Non-ART    | 545,816                   | 132              | Ref                                        | Ref                               | Ref                               |
|                         |          | ART        | 24,600                    | 7                | 0.88 (0.41-1.92)                           | 0.89 (0.41-1.95)                  | 0.87 (0.39-1.91)                  |
| Sweden                  | Non-ART  | 15,940,433 | 5,019                     | Ref              | Ref                                        | Ref                               |                                   |
|                         | ART      | 317,123    | 86                        | 0.82 (0.66-1.02) | 0.80 (0.64-0.99)                           | 0.77 (0.61-0.96)                  |                                   |
| Stroke                  | Combined | Non-ART    | 28,225,884                | 9,892            | Ref                                        | Ref                               | Ref                               |

|                    |          |         |            |       |                  |                  |                  |
|--------------------|----------|---------|------------|-------|------------------|------------------|------------------|
|                    |          | ART     | 696,191    | 298   | 1.05 (0.94-1.18) | 0.97 (0.86-1.09) | 0.97 (0.86-1.10) |
|                    | Denmark  | Non-ART | 5,066,364  | 2,956 | Ref              | Ref              | Ref              |
|                    |          | ART     | 195,698    | 137   | 1.11 (0.93-1.33) | 1.04 (0.87-1.24) | 1.06 (0.88-1.27) |
|                    | Finland  | Non-ART | 6,666,835  | 2,807 | Ref              | Ref              | Ref              |
|                    |          | ART     | 158,706    | 85    | 1.08 (0.86-1.35) | 1.06 (0.85-1.33) | 1.09 (0.87-1.36) |
|                    | Norway   | Non-ART | 545,950    | 85    | Ref              | Ref              | Ref              |
|                    |          | ART     | 24,605     | 5     | 0.95 (0.38-2.39) | 1.00 (0.39-2.52) | 0.99 (0.39-2.52) |
|                    | Sweden   | Non-ART | 15,946,736 | 4,044 | Ref              | Ref              | Ref              |
|                    |          | ART     | 317,183    | 71    | 0.83 (0.66-1.06) | 0.81 (0.64-1.03) | 0.77 (0.60-0.87) |
| Cardiomyopathy     | Combined | Non-ART | 28,370,320 | 1,718 | Ref              | Ref              | Ref              |
|                    |          | ART     | 697,407    | 43    | 0.84 (0.62-1.15) | 0.83 (0.61-1.13) | 0.81 (0.59-1.12) |
|                    | Denmark  | Non-ART | 5,079,861  | 294   | Ref              | Ref              | Ref              |
|                    |          | ART     | 196,351    | 10    | 0.77 (0.41-1.47) | 0.80 (0.42-1.52) | 0.72 (0.36-1.45) |
|                    | Finland  | Non-ART | 6,676,919  | 671   | Ref              | Ref              | Ref              |
|                    |          | ART     | 158,990    | 16    | 0.84 (0.50-1.38) | 0.83 (0.50-1.37) | 0.75 (0.45-1.27) |
|                    | Norway   | Non-ART | 546,022    | 55    | Ref              | Ref              | Ref              |
|                    |          | ART     | 24,613     | <5    | 1.15 (0.40-3.26) | 1.07 (0.37-3.10) | 1.04 (0.35-3.05) |
| Heart failure      | Sweden   | Non-ART | 15,967,519 | 698   | Ref              | Ref              | Ref              |
|                    |          | ART     | 317,453    | 13    | 0.84 (0.48-1.47) | 0.80 (0.46-1.41) | 0.88 (0.50-1.56) |
|                    | Combined | Non-ART | 28,267,472 | 2,559 | Ref              | Ref              | Ref              |
|                    |          | ART     | 697,408    | 65    | 0.83 (0.64-1.06) | 0.76 (0.59-0.97) | 0.78 (0.60-1.01) |
|                    | Denmark  | Non-ART | 5,078,894  | 567   | Ref              | Ref              | Ref              |
|                    |          | ART     | 196,314    | 23    | 0.86 (0.56-1.32) | 0.81 (0.53-1.24) | 0.89 (0.57-1.39) |
|                    | Finland  | Non-ART | 6,677,308  | 636   | Ref              | Ref              | Ref              |
|                    |          | ART     | 159,039    | 14    | 0.64 (0.37-1.10) | 0.61 (0.36-1.05) | 0.58 (0.34-1.01) |
| Pulmonary embolism | Norway   | Non-ART | 546,041    | 40    | Ref              | Ref              | Ref              |
|                    |          | ART     | 24,615     | <5    | 1.24 (0.37-4.15) | 1.19 (0.35-4.01) | 1.03 (0.30-3.56) |
|                    | Sweden   | Non-ART | 15,965,229 | 1,316 | Ref              | Ref              | Ref              |
|                    |          | ART     | 317,440    | 25    | 0.86 (0.57-1.28) | 0.80 (0.53-1.20) | 0.83 (0.55-1.24) |
|                    | Combined | Non-ART | 28,247,138 | 5,976 | Ref              | Ref              | Ref              |
|                    |          | ART     | 697,016    | 142   | 0.98 (0.83-1.16) | 0.93 (0.78-1.10) | 0.93 (0.78-1.11) |
|                    | Denmark  | Non-ART | 5,074,300  | 1,488 | Ref              | Ref              | Ref              |
|                    |          | ART     | 196,230    | 51    | 0.98 (0.73-1.30) | 0.95 (0.71-1.27) | 0.93 (0.69-1.25) |
| Pulmonary embolism | Finland  | Non-ART | 6,672,458  | 1,577 | Ref              | Ref              | Ref              |
|                    |          | ART     | 158,864    | 48    | 1.25 (0.93-1.68) | 1.24 (0.92-1.67) | 1.25 (0.92-1.69) |
|                    | Norway   | Non-ART | 545,841    | 124   | Ref              | Ref              | Ref              |
|                    |          | ART     | 24,610     | <5    | 0.87 (0.31-2.40) | 0.81 (0.29-2.68) | 0.85 (0.30-2.38) |



|                      |          |         |            |        |                  |                  |                  |
|----------------------|----------|---------|------------|--------|------------------|------------------|------------------|
| Deep vein thrombosis | Sweden   | Non-ART | 15,954,539 | 2,787  | Ref              | Ref              | Ref              |
|                      |          | ART     | 317,310    | 39     | 0.75 (0.54-1.04) | 0.72 (0.52-0.99) | 0.73 (0.53-1.01) |
|                      | Combined | Non-ART | 28,196,929 | 13,908 | Ref              | Ref              | Ref              |
|                      |          | ART     | 695,849    | 396    | 1.07 (0.97-1.19) | 1.02 (0.92-1.13) | 0.99 (0.89-1.10) |
|                      | Denmark  | Non-ART | 5,058,290  | 4,580  | Ref              | Ref              | Ref              |
|                      |          | ART     | 195,838    | 150    | 0.86 (0.73-1.02) | 0.86 (0.73-1.01) | 0.82 (0.69-0.98) |
|                      | Finland  | Non-ART | 6,643,747  | 6,436  | Ref              | Ref              | Ref              |
|                      |          | ART     | 158,189    | 185    | 1.20 (1.03-1.39) | 1.20 (1.03-1.40) | 1.16 (1.00-1.35) |
|                      | Norway   | Non-ART | 545,537    | 280    | Ref              | Ref              | Ref              |
|                      |          | ART     | 24,599     | 9      | 0.66 (0.33-1.29) | 0.68 (0.35-1.34) | 0.67 (0.34-1.32) |
|                      | Sweden   | Non-ART | 15,949,356 | 2,612  | Ref              | Ref              | Ref              |
|                      |          | ART     | 317,223    | 52     | 1.18 (0.89-1.56) | 1.10 (0.83-1.46) | 1.12 (0.84-1.50) |

<sup>a</sup> Adjusted for age parity, polycystic ovarian syndrome, diabetes, chronic hypertension, year of start of follow-up, in addition to country (in the combined model).

<sup>b</sup> Adjusted for age parity, polycystic ovarian syndrome, diabetes, chronic hypertension, year of start of follow-up, country (in the combined model), multiple gestation, preterm birth, small-for-gestational-age birth, stillbirth and hypertensive disorders of pregnancy.

eTable 6 Exploring sources of heterogeneity in the risk of cardiovascular disease according to conception by assisted reproductive technologies by excluding one country in turn

| Outcome                 | Including all four countries<br>I <sup>2</sup> , p-value | Excluding Denmark<br>I <sup>2</sup> , p-value | Excluding Finland<br>I <sup>2</sup> , p-value | Excluding Norway<br>I <sup>2</sup> , p-value | Excluding Sweden<br>I <sup>2</sup> , p-value |
|-------------------------|----------------------------------------------------------|-----------------------------------------------|-----------------------------------------------|----------------------------------------------|----------------------------------------------|
| Any CVD                 | 76%, 0.01                                                | 84%, 0.002                                    | 63%, 0.07                                     | 81%, 0.01                                    | 63%, 0.07                                    |
| Ischemic Heart disease  | 45%, 0.15                                                | 0%, 0.42                                      | 61%, 0.08                                     | 43%, 0.17                                    | 38%, 0.20                                    |
| Myocardial infarction   | 0%, 0.54                                                 | 0%, 0.49                                      | 0%, 0.38                                      | 0%, 0.49                                     | 0%, 0.64                                     |
| Cerebrovascular disease | 35%, 0.20                                                | 50%, 0.14                                     | 42%, 0.18                                     | 56%, 0.10                                    | 0%, 0.88                                     |
| Stroke                  | 11%, 0.34                                                | 24%, 0.27                                     | 27%, 0.25                                     | 81%, 0.01                                    | 0%, 0.99                                     |
| Cardiomyopathy          | 0%, 0.97                                                 | 0%, 0.89                                      | 0%, 0.88                                      | 0%, 0.99                                     | 0%, 0.90                                     |
| Heart failure           | 0%, 0.73                                                 | 0%, 0.54                                      | 0%, 0.83                                      | 0%, 0.67                                     | 0%, 0.54                                     |
| Pulmonary embolism      | 50%, 0.11                                                | 67%, 0.05                                     | 0%, 0.46                                      | 66%, 0.05                                    | 0%, 0.40                                     |
| Deep vein thrombosis    | 71%, 0.02                                                | 27%, 0.25                                     | 31%, 0.23                                     | 77%, 0.01                                    | 80%, 0.01                                    |

eTable 7 Sensitivity analysis of the risk of cardiovascular disease according to conception by assisted reproductive technologies adjusting for tobacco use and body mass index

| Outcome                 | Country  | Exposure   | N follow-up time in years | N events         | Age and calendar year adjusted HR (95% CI) | Adjusted <sup>a</sup> HR (95% CI) | Adjusted <sup>b</sup> HR (95% CI) |
|-------------------------|----------|------------|---------------------------|------------------|--------------------------------------------|-----------------------------------|-----------------------------------|
| Any CVD                 | Combined | Non-ART    | 19,377,836                | 23,086           | Ref                                        | Ref                               | Ref                               |
|                         |          | ART        | 433,339                   | 612              | 1.04 (0.96-1.13)                           | 1.00 (0.92-1.09)                  | 1.03 (0.95-1.12)                  |
|                         | Denmark  | Non-ART    | 2,470,912                 | 6,057            | Ref                                        | Ref                               | Ref                               |
|                         |          | ART        | 85,820                    | 232              | 1.05 (0.91-1.20)                           | 1.04 (0.91-1.19)                  | 1.06 (0.92-1.21)                  |
|                         | Finland  | Non-ART    | 2,420,287                 | 4,880            | Ref                                        | Ref                               | Ref                               |
|                         |          | ART        | 54,401                    | 147              | 1.30 (1.09-1.52)                           | 1.28 (1.08-1.52)                  | 1.31 (1.10-1.55)                  |
|                         | Norway   | Non-ART    | 309,851                   | 390              | Ref                                        | Ref                               | Ref                               |
|                         |          | ART        | 14,300                    | 15               | 0.69 (0.41-1.17)                           | 0.66 (0.39-1.13)                  | 0.68 (0.40-1.16)                  |
| Sweden                  | Non-ART  | 14,176,787 | 11,759                    | Ref              | Ref                                        | Ref                               |                                   |
|                         | ART      | 278,817    | 218                       | 0.92 (0.80-1.06) | 0.88 (0.77-1.01)                           | 0.90 (0.78-1.03)                  |                                   |
| Ischemic heart disease  | Combined | Non-ART    | 19,476,745                | 4,697            | Ref                                        | Ref                               | Ref                               |
|                         |          | ART        | 435,142                   | 131              | 0.92 (0.77-1.10)                           | 0.87 (0.72-1.03)                  | 0.91 (0.76-1.09)                  |
|                         | Denmark  | Non-ART    | 2,490,944                 | 1,427            | Ref                                        | Ref                               | Ref                               |
|                         |          | ART        | 86,358                    | 68               | 1.10 (0.86-1.43)                           | 1.08 (0.84-1.39)                  | 1.11 (0.86-1.43)                  |
|                         | Finland  | Non-ART    | 2,437,913                 | 546              | Ref                                        | Ref                               | Ref                               |
|                         |          | ART        | 54,826                    | 8                | 0.52 (0.26-1.05)                           | 0.52 (0.26-1.06)                  | 0.53 (0.26-1.08)                  |
|                         | Norway   | Non-ART    | 310,529                   | 45               | Ref                                        | Ref                               | Ref                               |
|                         |          | ART        | 14,323                    | <5               | 0.53 (0.13-2.23)                           | 0.36 (0.08-1.68)                  | 0.38 (0.08-1.75)                  |
| Sweden                  | Non-ART  | 14,237,359 | 2,679                     | Ref              | Ref                                        | Ref                               |                                   |
|                         | ART      | 279,636    | 53                        | 0.88 (0.67-1.17) | 0.80 (0.61-1.06)                           | 0.86 (0.65-1.13)                  |                                   |
| Cerebrovascular disease | Combined | Non-ART    | 19,461,441                | 7,036            | Ref                                        | Ref                               | Ref                               |
|                         |          | ART        | 434,920                   | 186              | 1.06 (0.91-1.23)                           | 1.01 (0.87-1.17)                  | 1.04 (0.90-1.21)                  |
|                         | Denmark  | Non-ART    | 2,489,043                 | 1,622            | Ref                                        | Ref                               | Ref                               |
|                         |          | ART        | 86,305                    | 68               | 1.18 (0.92-1.52)                           | 1.14 (0.89-1.46)                  | 1.16 (0.90-1.49)                  |
|                         | Finland  | Non-ART    | 2,436,124                 | 1,170            | Ref                                        | Ref                               | Ref                               |
|                         |          | ART        | 54,746                    | 41               | 1.32 (0.96-1.83)                           | 1.32 (0.95-1.82)                  | 1.36 (0.98-1.88)                  |
|                         | Norway   | Non-ART    | 310,464                   | 70               | Ref                                        | Ref                               | Ref                               |
|                         |          | ART        | 14,321                    | <5               | 0.65 (0.20-2.11)                           | 0.66 (0.20-2.17)                  | 0.70 (0.22-2.29)                  |

|                       |          |         |            |       |                  |                  |                  |
|-----------------------|----------|---------|------------|-------|------------------|------------------|------------------|
|                       | Sweden   | Non-ART | 14,225,811 | 4,174 | Ref              | Ref              | Ref              |
|                       |          | ART     | 279,549    | 74    | 0.88 (0.70-1.11) | 0.86 (0.68-1.08) | 0.88 (0.70-1.12) |
| Myocardial Infarction | Combined | Non-ART | 19,489,874 | 1,862 | Ref              | Ref              | Ref              |
|                       |          | ART     | 435,506    | 41    | 0.85 (0.62-1.16) | 0.77 (0.56-1.06) | 0.84 (0.61-1.16) |
|                       | Denmark  | Non-ART | 2,495,297  | 244   | Ref              | Ref              | Ref              |
|                       |          | ART     | 86,529     | 12    | 1.15 (0.63-2.09) | 1.10 (0.60-2.00) | 1.15 (0.63-2.10) |
|                       | Finland  | Non-ART | 2,439,736  | 92    | Ref              | Ref              | Ref              |
|                       |          | ART     | 54,855     | <5    | 0.28 (0.04-2.06) | 0.26 (0.04-1.94) | 0.29 (0.04-2.11) |
|                       | Norway   | Non-ART | 310,588    | 13    | Ref              | Ref              | Ref              |
|                       |          | ART     | 14,323     | <5    | 0.80 (0.10-6.42) | 0.77 (0.09-6.80) | 0.95 (0.11-8.16) |
|                       | Sweden   | Non-ART | 14,244,253 | 1,513 | Ref              | Ref              | Ref              |
|                       |          | ART     | 279,798    | 27    | 0.82 (0.56-1.21) | 0.74 (0.50-1.09) | 0.81 (0.55-1.19) |
| Stroke                | Combined | Non-ART | 19,469,849 | 5,383 | Ref              | Ref              | Ref              |
|                       |          | ART     | 435,069    | 143   | 1.07 (0.90-1.27) | 1.03 (0.87-1.22) | 1.06 (0.89-1.26) |
|                       | Denmark  | Non-ART | 2,490,858  | 1,212 | Ref              | Ref              | Ref              |
|                       |          | ART     | 86,367     | 52    | 1.25 (0.93-1.66) | 1.20 (0.90-1.60) | 1.22 (0.92-1.63) |
|                       | Finland  | Non-ART | 2,437,351  | 779   | Ref              | Ref              | Ref              |
|                       |          | ART     | 54,772     | 28    | 1.33 (0.90-1.98) | 1.34 (0.90-1.98) | 1.38 (0.93-2.05) |
|                       | Norway   | Non-ART | 310,526    | 47    | Ref              | Ref              | Ref              |
|                       |          | ART     | 14,321     | <5    | 0.60 (1.14-2.54) | 0.69 (0.16-2.91) | 0.73 (0.17-3.06) |
|                       | Sweden   | Non-ART | 14,231,114 | 3,345 | Ref              | Ref              | Ref              |
|                       |          | ART     | 279,608    | 61    | 0.90 (0.69-1.16) | 0.87 (0.67-1.13) | 0.90 (0.69-1.16) |
| Cardiomyopathy        | Combined | Non-ART | 19,493,066 | 983   | Ref              | Ref              | Ref              |
|                       |          | ART     | 435,541    | 22    | 0.82 (0.53-1.26) | 0.80 (0.52-1.24) | 0.83 (0.54-1.28) |
|                       | Denmark  | Non-ART | 2,495,421  | 140   | Ref              | Ref              | Ref              |
|                       |          | ART     | 86,537     | 7     | 1.30 (0.59-2.83) | 1.39 (0.63-3.04) | 1.43 (0.65-3.13) |
|                       | Finland  | Non-ART | 2,439,255  | 206   | Ref              | Ref              | Ref              |
|                       |          | ART     | 54,849     | <5    | 0.52 (0.16-1.65) | 0.51 (0.16-1.63) | 0.53 (0.17-1.69) |
|                       | Norway   | Non-ART | 310,557    | 34    | Ref              | Ref              | Ref              |
|                       |          | ART     | 14,322     | 2     | 0.78 (0.18-3.45) | 0.75 (0.17-3.25) | 0.74 (0.17-3.23) |
|                       | Sweden   | Non-ART | 14,247,833 | 603   | Ref              | Ref              | Ref              |
|                       |          | ART     | 279,832    | 10    | 0.75 (0.40-1.42) | 0.72 (0.38-1.36) | 0.74 (0.39-1.40) |
| Heart failure         | Combined | Non-ART | 19,491,409 | 1,425 | Ref              | Ref              | Ref              |

|                      |          |         |            |       |                  |                  |                  |
|----------------------|----------|---------|------------|-------|------------------|------------------|------------------|
|                      |          | ART     | 435,535    | 37    | 1.04 (0.74-1.45) | 0.98 (0.70-1.37) | 1.03 (0.73-1.44) |
|                      | Denmark  | Non-ART | 2,495,292  | 196   | Ref              | Ref              | Ref              |
|                      |          | ART     | 86,541     | 9     | 1.34 (0.67-2.68) | 1.36 (0.68-2.73) | 1.41 (0.70-2.82) |
|                      | Finland  | Non-ART | 2,439,388  | 156   | Ref              | Ref              | Ref              |
|                      |          | ART     | 54,850     | <5    | 0.76 (0.27-2.11) | 0.71 (0.26-1.98) | 0.75 (0.27-2.10) |
|                      | Norway   | Non-ART | 310,574    | 24    | Ref              | Ref              | Ref              |
|                      |          | ART     | 14,322     | <5    | 1.99 (0.57-6.99) | 1.83 (0.51-6.57) | 1.81 (0.50-6.51) |
|                      | Sweden   | Non-ART | 14,246,155 | 1,049 | Ref              | Ref              | Ref              |
|                      |          | ART     | 279,823    | 21    | 0.95 (0.61-1.47) | 0.89 (0.57-1.39) | 0.93 (0.60-1.45) |
| Pulmonary embolism   | Combined | Non-ART | 19,477,727 | 3,832 | Ref              | Ref              | Ref              |
|                      |          | ART     | 435,316    | 75    | 0.89 (0.71-1.13) | 0.86 (0.68-1.09) | 0.87 (0.69-1.10) |
|                      | Denmark  | Non-ART | 2,492,722  | 805   | Ref              | Ref              | Ref              |
|                      |          | ART     | 86,518     | 21    | 0.80 (0.52-1.25) | 0.80 (0.51-1.24) | 0.80 (0.51-1.25) |
|                      | Finland  | Non-ART | 2,437,775  | 555   | Ref              | Ref              | Ref              |
|                      |          | ART     | 54,788     | 16    | 1.35 (0.81-2.26) | 1.34 (0.80-2.24) | 1.35 (0.81-2.26) |
|                      | Norway   | Non-ART | 310,449    | 78    | Ref              | Ref              | Ref              |
|                      |          | ART     | 14,320     | <5    | 0.97 (0.30-3.18) | 0.85 (0.26-2.85) | 0.85 (0.26-2.85) |
| Deep vein thrombosis | Sweden   | Non-ART | 14,236,782 | 2,394 | Ref              | Ref              | Ref              |
|                      |          | ART     | 279,690    | 35    | 0.79 (0.56-1.11) | 0.76 (0.54-1.07) | 0.76 (0.54-1.08) |
|                      | Combined | Non-ART | 19,457,409 | 7,292 | Ref              | Ref              | Ref              |
|                      |          | ART     | 434,885    | 198   | 1.14 (0.98-1.31) | 1.11 (0.96-1.28) | 1.13 (0.98-1.31) |
|                      | Denmark  | Non-ART | 2,486,304  | 2,294 | Ref              | Ref              | Ref              |
|                      |          | ART     | 86,356     | 67    | 0.86 (0.67-1.11) | 0.88 (0.68-1.13) | 0.90 (0.70-1.16) |
|                      | Finland  | Non-ART | 2,428,537  | 2,581 | Ref              | Ref              | Ref              |
|                      |          | ART     | 54,597     | 80    | 1.48 (1.17-1.85) | 1.47 (1.17-1.85) | 1.50 (1.19-1.88) |
| Norway               | Non-ART  | 310,295 | 160        | Ref   | Ref              | Ref              |                  |
|                      |          | ART     | 14,318     | <5    | 0.52 (0.19-1.44) | 0.55 (0.20-1.50) | 0.56 (0.20-1.53) |
|                      | Sweden   | Non-ART | 14,232,283 | 2,257 | Ref              | Ref              | Ref              |
|                      |          | ART     | 279,613    | 47    | 1.23 (0.92-1.66) | 1.16 (0.86-1.57) | 1.17 (0.86-1.57) |

<sup>a</sup> Adjusted for age, parity, polycystic ovarian syndrome, chronic hypertension, diabetes, year of start of follow-up in addition to country (in the pooled model).

<sup>b</sup> Adjusted for age, parity, polycystic ovarian syndrome, chronic hypertension, diabetes, year of start of follow-up, country (in the combined model), in addition to tobacco use and body-mass index.

eTable 8 Sensitivity analysis of the risk of cardiovascular disease according to conception by assisted reproductive technologies adjusting for education

| Outcome                 | Country  | Exposure | N follow-up time in years | N events | Age and calendar year adjusted HR (95% CI) | Adjusted <sup>a</sup> HR (95% CI) | Adjusted <sup>b</sup> HR (95% CI) |
|-------------------------|----------|----------|---------------------------|----------|--------------------------------------------|-----------------------------------|-----------------------------------|
| Any CVD                 | Combined | Non-ART  | 26,287,103                | 39,862   | Ref                                        | Ref                               | Ref                               |
|                         |          | ART      | 646,897                   | 1,238    | 1.05 (0.99-1.11)                           | 0.97 (0.92-1.03)                  | 0.96 (0.91-1.02)                  |
|                         | Denmark  | Non-ART  | 4,969,445                 | 13,389   | Ref                                        | Ref                               | Ref                               |
|                         |          | ART      | 192,714                   | 588      | 1.01 (0.93-1.10)                           | 0.98 (0.90-1.07)                  | 0.96 (0.88-1.04)                  |
|                         | Finland  | Non-ART  | 6,023,551                 | 12,755   | Ref                                        | Ref                               | Ref                               |
|                         |          | ART      | 149,372                   | 402      | 1.11 (1.00-1.23)                           | 1.10 (0.99-1.22)                  | 1.11 (1.00-1.23)                  |
|                         | Sweden   | Non-ART  | 15,294,107                | 13,718   | Ref                                        | Ref                               | Ref                               |
|                         |          | ART      | 304,810                   | 248      | 0.87 (0.77-0.99)                           | 0.83 (0.73-0.94)                  | 0.81 (0.72-0.93)                  |
| Ischemic heart disease  | Combined | Non-ART  | 26,460,828                | 9,511    | Ref                                        | Ref                               | Ref                               |
|                         |          | ART      | 650,930                   | 357      | 1.05 (0.94-1.17)                           | 0.92 (0.82-1.03)                  | 0.91 (0.81-1.01)                  |
|                         | Denmark  | Non-ART  | 5,017,780                 | 3,492    | Ref                                        | Ref                               | Ref                               |
|                         |          | ART      | 194,324                   | 219      | 1.07 (0.93-1.24)                           | 1.01 (0.88-1.17)                  | 0.99 (0.86-1.14)                  |
|                         | Finland  | Non-ART  | 6,078,809                 | 2,220    | Ref                                        | Ref                               | Ref                               |
|                         |          | ART      | 150,859                   | 71       | 0.93 (0.73-1.18)                           | 0.92 (0.72-1.17)                  | 0.93 (0.73-1.18)                  |
|                         | Sweden   | Non-ART  | 15,364,240                | 3,349    | Ref                                        | Ref                               | Ref                               |
|                         |          | ART      | 305,746                   | 67       | 0.88 (0.69-1.12)                           | 0.80 (0.62-1.02)                  | 0.78 (0.61-1.00)                  |
| Cerebrovascular disease | Combined | Non-ART  | 26,411,402                | 12,068   | Ref                                        | Ref                               | Ref                               |
|                         |          | ART      | 650,890                   | 367      | 1.04 (0.94-1.16)                           | 0.96 (0.87-1.07)                  | 0.95 (0.86-1.06)                  |
|                         | Denmark  | Non-ART  | 5,016,982                 | 3,758    | Ref                                        | Ref                               | Ref                               |
|                         |          | ART      | 194,469                   | 174      | 1.09 (0.93-1.28)                           | 1.03 (0.88-1.21)                  | 1.01 (0.86-1.18)                  |
|                         | Finland  | Non-ART  | 6,072,393                 | 3,429    | Ref                                        | Ref                               | Ref                               |
|                         |          | ART      | 150,733                   | 113      | 1.12 (0.93-1.36)                           | 1.10 (0.91-1.33)                  | 1.11 (0.91-1.34)                  |
|                         | Sweden   | Non-ART  | 15,352,028                | 4,881    | Ref                                        | Ref                               | Ref                               |
|                         |          | ART      | 305,688                   | 80       | 0.78 (0.63-0.98)                           | 0.76 (0.61-0.95)                  | 0.75 (0.60-0.94)                  |
| Myocardial Infarction   | Combined | Non-ART  | 26,492,194                | 3,229    | Ref                                        | Ref                               | Ref                               |
|                         |          | ART      | 652,257                   | 95       | 0.95 (0.77-1.18)                           | 0.84 (0.68-1.04)                  | 0.83 (0.67-1.02)                  |
|                         | Denmark  | Non-ART  | 5,032,534                 | 801      | Ref                                        | Ref                               | Ref                               |
|                         |          | ART      | 195,170                   | 41       | 1.04 (0.75-1.43)                           | 0.94 (0.68-1.30)                  | 0.91 (0.66-1.25)                  |

|                    |          |         |            |       |                  |                  |                  |
|--------------------|----------|---------|------------|-------|------------------|------------------|------------------|
|                    | Finland  | Non-ART | 6,086,423  | 547   | Ref              | Ref              | Ref              |
|                    |          | ART     | 151,121    | 20    | 1.08 (0.68-1.71) | 1.05 (0.66-1.65) | 1.06 (0.67-1.68) |
|                    | Sweden   | Non-ART | 15,373,237 | 1,881 | Ref              | Ref              | Ref              |
|                    |          | ART     | 305,966    | 34    | 0.80 (0.57-1.13) | 0.72 (0.51-1.02) | 0.71 (0.50-1.00) |
| Stroke             | Combined | Non-ART | 24,456,115 | 9,305 | Ref              | Ref              | Ref              |
|                    |          | ART     | 651,255    | 282   | 1.04 (0.92-1.18) | 0.96 (0.85-1.08) | 0.95 (0.84-1.07) |
|                    | Denmark  | Non-ART | 5,021,130  | 2,927 | Ref              | Ref              | Ref              |
|                    |          | ART     | 194,638    | 136   | 1.12 (0.94-1.33) | 1.05 (0.88-1.25) | 1.02 (0.85-1.22) |
|                    | Finland  | Non-ART | 6,076,765  | 2,442 | Ref              | Ref              | Ref              |
|                    |          | ART     | 150,871    | 80    | 1.10 (0.88-1.38) | 1.08 (0.86-1.36) | 1.09 (0.87-1.37) |
|                    | Sweden   | Non-ART | 15,358,219 | 3,936 | Ref              | Ref              | Ref              |
|                    |          | ART     | 305,747    | 66    | 0.79 (0.62-1.01) | 0.77 (0.60-0.98) | 0.76 (0.59-0.97) |
| Cardiomyopathy     | Combined | Non-ART | 26,498,755 | 1,555 | Ref              | Ref              | Ref              |
|                    |          | ART     | 652,424    | 38    | 0.83 (0.60-1.15) | 0.81 (0.59-1.13) | 0.81 (0.58-1.13) |
|                    | Denmark  | Non-ART | 5,034,513  | 292   | Ref              | Ref              | Ref              |
|                    |          | ART     | 195,289    | 10    | 0.77 (0.40-1.46) | 0.79 (0.41-1.50) | 0.78 (0.41-1.50) |
|                    | Finland  | Non-ART | 6,085,582  | 592   | Ref              | Ref              | Ref              |
|                    |          | ART     | 151,128    | 15    | 0.83 (0.49-1.40) | 0.82 (0.49-1.39) | 0.82 (0.49-1.39) |
|                    | Sweden   | Non-ART | 15,378,659 | 671   | Ref              | Ref              | Ref              |
|                    |          | ART     | 306,007    | 13    | 0.88 (0.50-1.53) | 0.84 (0.48-1.47) | 0.83 (0.47-1.45) |
| Heart failure      | Combined | Non-ART | 26,495,920 | 2,378 | Ref              | Ref              | Ref              |
|                    |          | ART     | 652,425    | 58    | 0.79 (0.60-1.03) | 0.72 (0.55-0.94) | 0.71 (0.54-0.93) |
|                    | Denmark  | Non-ART | 5,033,568  | 561   | Ref              | Ref              | Ref              |
|                    |          | ART     | 195,251    | 23    | 0.86 (0.56-1.32) | 0.80 (0.52-1.23) | 0.78 (0.51-1.20) |
|                    | Finland  | Non-ART | 6,085,954  | 545   | Ref              | Ref              | Ref              |
|                    |          | ART     | 151,179    | 10    | 0.51 (0.27-0.95) | 0.49 (0.26-0.92) | 0.50 (0.26-0.93) |
|                    | Sweden   | Non-ART | 15,376,398 | 1,272 | Ref              | Ref              | Ref              |
|                    |          | ART     | 305,995    | 25    | 0.88 (0.58-1.31) | 0.82 (0.54-1.22) | 0.80 (0.54-1.20) |
| Pulmonary embolism | Combined | Non-ART | 26,476,460 | 5,574 | Ref              | Ref              | Ref              |
|                    |          | ART     | 652,031    | 137   | 1.00 (0.84-1.19) | 0.94 (0.79-1.12) | 0.93 (0.78-1.11) |
|                    | Denmark  | Non-ART | 5,028,991  | 1,474 | Ref              | Ref              | Ref              |
|                    |          | ART     | 195,167    | 51    | 0.98 (0.74-1.31) | 0.95 (0.72-1.27) | 0.94 (0.70-1.25) |
|                    | Finland  | Non-ART | 6,081,601  | 1,397 | Ref              | Ref              | Ref              |

|                      |          |         |            |        |                  |                  |                  |
|----------------------|----------|---------|------------|--------|------------------|------------------|------------------|
|                      |          | ART     | 150,999    | 47     | 1.29 (0.96-1.74) | 1.27 (0.94-1.72) | 1.28 (0.95-1.72) |
|                      | Sweden   | Non-ART | 15,365,869 | 2,703  | Ref              | Ref              | Ref              |
|                      |          | ART     | 305,865    | 39     | 0.76 (0.55-1.05) | 0.73 (0.53-1.01) | 0.72 (0.52-1.00) |
| Deep vein thrombosis | Combined | Non-ART | 26,429,333 | 12,862 | Ref              | Ref              | Ref              |
|                      |          | ART     | 650,926    | 376    | 1.07 (0.97-1.19) | 1.02 (0.92-1.13) | 1.01 (0.91-1.12) |
|                      | Denmark  | Non-ART | 5,013,058  | 4,535  | Ref              | Ref              | Ref              |
|                      |          | ART     | 194,776    | 150    | 0.87 (0.74-1.03) | 0.86 (0.73-1.02) | 0.84 (0.71-1.00) |
|                      | Finland  | Non-ART | 6,055,546  | 5,790  | Ref              | Ref              | Ref              |
|                      |          | ART     | 150,368    | 176    | 1.19 (1.02-1.39) | 1.19 (1.02-1.39) | 1.20 (1.03-1.40) |
|                      | Sweden   | Non-ART | 15,360,729 | 2,537  | Ref              | Ref              | Ref              |
|                      |          | ART     | 305,781    | 50     | 1.17 (0.87-1.55) | 1.09 (0.81-1.45) | 1.07 (0.80-1.42) |

<sup>a</sup> Adjusted for age, parity, polycystic ovarian syndrome, chronic hypertension, diabetes, year of start of follow-up, in addition to country (in the combined model).

<sup>b</sup> Adjusted for age, parity, polycystic ovarian syndrome, chronic hypertension, diabetes, year of start of follow-up, country (in the combined model), in addition to highest obtained educational level.



eTable 9 Risk of any cardiovascular disease according to conception by assisted reproductive technologies excluding pulmonary embolism and deep vein thrombosis from the outcome definition

| Country  | Exposure | N follow-up time in years | N events | Age and calendar year adjusted HR (95% CI) | Adjusted <sup>a</sup> HR (95% CI) |
|----------|----------|---------------------------|----------|--------------------------------------------|-----------------------------------|
| Combined | Non-ART  | 28,156,939                | 23,749   | Ref                                        | Ref                               |
|          | ART      | 693,958                   | 773      | 1.03 (0.96-1.11)                           | 0.93 (0.87-1.00)                  |
| Denmark  | Non-ART  | 5,043,171                 | 7,829    | Ref                                        | Ref                               |
|          | ART      | 194,484                   | 394      | 1.08 (0.97-1.19)                           | 1.02 (0.92-1.13)                  |
| Finland  | Non-ART  | 6,649,034                 | 6,807    | Ref                                        | Ref                               |
|          | ART      | 158,165                   | 201      | 0.98 (0.85-1.13)                           | 0.97 (0.84-1.11)                  |
| Norway   | Non-ART  | 545,576                   | 263      | Ref                                        | Ref                               |
|          | ART      | 24,586                    | 15       | 0.83 (0.49-1.41)                           | 0.77 (0.45-1.32)                  |
| Sweden   | Non-ART  | 15,919,159                | 8,850    | Ref                                        | Ref                               |
|          | ART      | 316,721                   | 163      | 0.83 (0.71-0.98)                           | 0.79 (0.67-0.92)                  |

<sup>a</sup> Adjusted for age, parity, polycystic ovarian syndrome, diabetes, chronic hypertension, year of start of follow-up, in addition to country (in the combined model).

eTable 10 Risk of subgroups of cardiovascular disease according to conception by assisted reproductive technologies also including parous women at the start of follow-up

| Outcome                | Country  | Exposure   | N follow-up time in years | N events         | Age and calendar year adjusted HR (95% CI) | Fully adjusted <sup>a</sup> HR (95% CI) |
|------------------------|----------|------------|---------------------------|------------------|--------------------------------------------|-----------------------------------------|
| Any CVD                | Combined | Non-ART    | 46,001,868                | 100,273          | Ref                                        | Ref                                     |
|                        |          | ART        | 952,663                   | 2,136            | 0.93 (0.89-0.97)                           | 0.96 (0.91-1.00)                        |
|                        | Denmark  | Non-ART    | 7,422,334                 | 24,001           | Ref                                        | Ref                                     |
|                        |          | ART        | 244,572                   | 819              | 0.95 (0.89-1.02)                           | 0.96 (0.89-1.03)                        |
|                        | Finland  | Non-ART    | 9,590,403                 | 24,710           | Ref                                        | Ref                                     |
|                        |          | ART        | 204,536                   | 612              | 1.04 (0.96-1.13)                           | 1.06 (0.98-1.15)                        |
|                        | Norway   | Non-ART    | 4,636,919                 | 19,066           | Ref                                        | Ref                                     |
|                        |          | ART        | 109,194                   | 325              | 0.91 (0.82-1.02)                           | 0.91 (0.81-1.01)                        |
| Sweden                 | Non-ART  | 24,352,212 | 32,496                    | Ref              | Ref                                        |                                         |
|                        | ART      | 394,361    | 380                       | 0.89 (0.80-0.98) | 0.87 (0.78-0.96)                           |                                         |
| Ischemic heart disease | Combined | Non-ART    | 46,545,016                | 34,297           | Ref                                        | Ref                                     |
|                        |          | ART        | 965,517                   | 685              | 0.87 (0.80-0.94)                           | 0.94 (0.87-1.01)                        |
|                        | Denmark  | Non-ART    | 7,543,697                 | 8,750            | Ref                                        | Ref                                     |
|                        |          | ART        | 248,943                   | 321              | 0.96 (0.86-1.08)                           | 1.00 (0.89-1.12)                        |
|                        | Finland  | Non-ART    | 9,738,506                 | 5,983            | Ref                                        | Ref                                     |
|                        |          | ART        | 208,327                   | 128              | 0.90 (0.76-1.08)                           | 0.94 (0.79-1.13)                        |
|                        | Norway   | Non-ART    | 4,689,242                 | 8,617            | Ref                                        | Ref                                     |
|                        |          | ART        | 110,376                   | 133              | 0.94 (0.79-1.12)                           | 0.96 (0.81-1.15)                        |
| Sweden                 | Non-ART  | 24,573,572 | 10,947                    | Ref              | Ref                                        |                                         |
|                        | ART      | 397,871    | 103                       | 0.86 (0.71-1.05) | 0.83 (0.68-1.02)                           |                                         |
| Myocardial Infarction  | Combined | Non-ART    | 46,682,096                | 11,819           | Ref                                        | Ref                                     |
|                        |          | ART        | 968,455                   | 176              | 0.81 (0.70-0.95)                           | 0.82 (0.70-0.95)                        |
|                        | Denmark  | Non-ART    | 7,583,846                 | 1,800            | Ref                                        | Ref                                     |
|                        |          | ART        | 250,386                   | 58               | 0.89 (0.68-1.15)                           | 0.88 (0.68-1.15)                        |
|                        | Finland  | Non-ART    | 9,764,216                 | 1,618            | Ref                                        | Ref                                     |
|                        |          | ART        | 208,977                   | 32               | 0.86 (0.61-1.23)                           | 0.88 (0.62-1.26)                        |
|                        | Norway   | Non-ART    | 4,721,406                 | 2,604            | Ref                                        | Ref                                     |
|                        |          | ART        | 110,814                   | 32               | 0.75 (0.53-1.06)                           | 0.72 (0.51-1.03)                        |

|                         |          |            |            |                  |                  |                  |
|-------------------------|----------|------------|------------|------------------|------------------|------------------|
|                         | Sweden   | Non-ART    | 24,612,628 | 5,797            | Ref              | Ref              |
|                         |          | ART        | 398,277    | 54               | 0.86 (0.65-1.12) | 0.82 (0.62-1.07) |
| Cerebrovascular disease | Combined | Non-ART    | 46,529,988 | 30,306           | Ref              | Ref              |
|                         |          | ART        | 964,888    | 612              | 0.91 (0.84-0.98) | 0.92 (0.85-0.99) |
|                         | Denmark  | Non-ART    | 7,546,164  | 6,837            | Ref              | Ref              |
|                         |          | ART        | 248,816    | 239              | 0.99 (0.87-1.13) | 0.97 (0.85-1.10) |
|                         | Finland  | Non-ART    | 9,725,010  | 7,126            | Ref              | Ref              |
|                         |          | ART        | 208,117    | 167              | 1.00 (0.86-1.17) | 0.99 (0.85-1.16) |
|                         | Norway   | Non-ART    | 4,706,917  | 5,037            | Ref              | Ref              |
|                         |          | ART        | 110,509    | 80               | 0.87 (0.69-1.08) | 0.85 (0.68-1.06) |
| Sweden                  | Non-ART  | 24,551,898 | 11,306     | Ref              | Ref              |                  |
|                         | ART      | 397,446    | 126        | 0.83 (0.70-0.99) | 0.82 (0.69-0.98) |                  |
| Stroke                  | Combined | Non-ART    | 46,581,584 | 23,229           | Ref              | Ref              |
|                         |          | ART        | 966,019    | 452              | 0.89 (0.81-0.98) | 0.90 (0.82-0.99) |
|                         | Denmark  | Non-ART    | 7,556,137  | 5,416            | Ref              | Ref              |
|                         |          | ART        | 249,207    | 183              | 0.97 (0.84-1.13) | 0.94 (0.81-1.10) |
|                         | Finland  | Non-ART    | 9,736,756  | 5,338            | Ref              | Ref              |
|                         |          | ART        | 208,388    | 118              | 0.97 (0.81-1.16) | 0.98 (0.81-1.17) |
|                         | Norway   | Non-ART    | 4,718,215  | 3,202            | Ref              | Ref              |
|                         |          | ART        | 110,757    | 46               | 0.77 (0.58-1.04) | 0.75 (0.56-1.01) |
| Sweden                  | Non-ART  | 24,570,474 | 9,273      | Ref              | Ref              |                  |
|                         | ART      | 397,667    | 105        | 0.86 (0.71-1.05) | 0.85 (0.70-1.03) |                  |
| Cardiomyopathy          | Combined | Non-ART    | 46,714,664 | 4,018            | Ref              | Ref              |
|                         |          | ART        | 968,594    | 81               | 0.88 (0.70-1.09) | 0.92 (0.73-1.15) |
|                         | Denmark  | Non-ART    | 7,588,682  | 571              | Ref              | Ref              |
|                         |          | ART        | 250,482    | 14               | 0.68 (0.40-1.17) | 0.72 (0.42-1.23) |
|                         | Finland  | Non-ART    | 9,764,329  | 1,158            | Ref              | Ref              |
|                         |          | ART        | 208,958    | 23               | 0.85 (0.56-1.29) | 0.84 (0.55-1.28) |
|                         | Norway   | Non-ART    | 4,727,052  | 866              | Ref              | Ref              |
|                         |          | ART        | 110,829    | 23               | 1.30 (0.86-1.98) | 1.22 (0.80-1.86) |
| Sweden                  | Non-ART  | 24,634,604 | 1,423      | Ref              | Ref              |                  |
|                         | ART      | 398,326    | 21         | 0.95 (0.61-1.46) | 0.91 (0.59-1.42) |                  |
| Heart failure           | Combined | Non-ART    | 46,708,348 | 3,872            | Ref              | Ref              |
|                         |          | ART        | 968,294    | 75               | 0.86 (0.68-1.08) | 0.88 (0.69-1.10) |
|                         | Denmark  | Non-ART    | 7,587,666  | 568              | Ref              | Ref              |
|                         |          | ART        | 250,418    | 12               | 0.58 (0.33-1.05) | 0.62 (0.35-1.10) |
| Finland                 | Non-ART  | 9,763,309  | 1,119      | Ref              | Ref              |                  |

|                    |                      |          |            |            |                  |                  |                  |
|--------------------|----------------------|----------|------------|------------|------------------|------------------|------------------|
|                    |                      | ART      | 208,871    | 22         | 0.83 (0.54-1.28) | 0.83 (0.54-1.28) |                  |
|                    | Norway               | Non-ART  | 4,725,053  | 824        | Ref              | Ref              |                  |
|                    |                      | ART      | 110,806    | 21         | 1.25 (0.81-1.93) | 1.17 (0.75-1.81) |                  |
|                    | Sweden               | Non-ART  | 24,632,318 | 1,361      | Ref              | Ref              |                  |
|                    |                      | ART      | 398,199    | 20         | 0.93 (0.60-1.47) | 0.91 (0.58-1.43) |                  |
| Pulmonary embolism | Combined             | Non-ART  | 46,656,304 | 11,914     | Ref              | Ref              |                  |
|                    |                      | ART      | 967,050    | 261        | 1.05 (0.95-1.19) | 1.03 (0.91-1.17) |                  |
|                    | Denmark              | Non-ART  | 7,575,670  | 2,309      | Ref              | Ref              |                  |
|                    |                      | ART      | 249,952    | 80         | 1.06 (0.85-1.33) | 1.05 (0.83-1.31) |                  |
|                    | Finland              | Non-ART  | 9,756,047  | 2,574      | Ref              | Ref              |                  |
|                    |                      | ART      | 208,679    | 72         | 1.20 (0.95-1.52) | 1.20 (0.95-1.53) |                  |
|                    | Norway               | Non-ART  | 4,724,036  | 1,835      | Ref              | Ref              |                  |
|                    |                      | ART      | 110,711    | 38         | 1.05 (0.76-1.45) | 1.02 (0.74-1.41) |                  |
|                    | Sweden               | Non-ART  | 24,600,549 | 5,196      | Ref              | Ref              |                  |
|                    |                      | ART      | 397,707    | 71         | 0.92 (0.73-1.17) | 0.90 (0.71-1.15) |                  |
|                    | Deep vein thrombosis | Combined | Non-ART    | 46,492,380 | 26,126           | Ref              | Ref              |
|                    |                      |          | ART        | 963,116    | 634              | 1.01 (0.93-1.09) | 1.06 (0.97-1.14) |
| Denmark            |                      | Non-ART  | 7,532,433  | 7,334      | Ref              | Ref              |                  |
|                    |                      | ART      | 248,683    | 219        | 0.89 (0.78-1.02) | 0.91 (0.79-1.04) |                  |
| Finland            |                      | Non-ART  | 9,684,209  | 9,708      | Ref              | Ref              |                  |
|                    |                      | ART      | 206,895    | 259        | 1.18 (1.04-1.33) | 1.22 (1.08-1.38) |                  |
| Norway             |                      | Non-ART  | 4,712,268  | 3,924      | Ref              | Ref              |                  |
|                    |                      | ART      | 110,463    | 83         | 1.00 (0.80-1.24) | 0.99 (0.79-1.23) |                  |
| Sweden             |                      | Non-ART  | 24,563,469 | 5,160      | Ref              | Ref              |                  |
|                    |                      | ART      | 397,075    | 73         | 1.13 (0.90-1.43) | 1.10 (0.87-1.39) |                  |

<sup>a</sup> Adjusted for age, parity, polycystic ovarian syndrome, chronic hypertension, diabetes, year of start of follow-up in addition to country (in the combined model).

eTable 11 Stratified analysis of the risk of cardiovascular disease according to conception by assisted reproductive technologies by year of start of follow-up

| Outcome                 | Year of start of follow-up | Exposure | N follow-up time in years | N events | Age and calendar year adjusted HR (95% CI) | Adjusted <sup>a</sup> HR (95% CI) | Adjusted <sup>b</sup> HR (95% CI) |
|-------------------------|----------------------------|----------|---------------------------|----------|--------------------------------------------|-----------------------------------|-----------------------------------|
| Any CVD                 | 1988-1997                  | Non-ART  | 14,525,361                | 22,435   | Ref                                        | Ref                               | Ref                               |
|                         |                            | ART      | 148,374                   | 320      | 0.92 (0.83-1.03)                           | 0.94 (0.84-1.05)                  | 0.92 (0.82-1.03)                  |
|                         | 1998-2007                  | Non-ART  | 10,382,888                | 16,225   | Ref                                        | Ref                               | Ref                               |
|                         |                            | ART      | 392,745                   | 762      | 1.10 (1.02-1.18)                           | 0.98 (0.91-1.05)                  | 0.97 (0.90-1.05)                  |
|                         | 2008-2017                  | Non-ART  | 3,139,035                 | 4,025    | Ref                                        | Ref                               | Ref                               |
|                         |                            | ART      | 150,560                   | 221      | 1.06 (0.92-1.22)                           | 1.02 (0.89-1.17)                  | 1.01 (0.87-1.16)                  |
| Ischemic heart disease  | 1988-1997                  | Non-ART  | 14,638,827                | 6,041    | Ref                                        | Ref                               | Ref                               |
|                         |                            | ART      | 149,700                   | 105      | 0.83 (0.68-1.01)                           | 0.83 (0.68-1.01)                  | 0.83 (0.67-1.01)                  |
|                         | 1998-2007                  | Non-ART  | 10,445,882                | 3,450    | Ref                                        | Ref                               | Ref                               |
|                         |                            | ART      | 395,305                   | 232      | 1.20 (1.05-1.38)                           | 1.00 (0.87-1.14)                  | 1.01 (0.87-1.16)                  |
|                         | 2008-2017                  | Non-ART  | 3,145,155                 | 528      | Ref                                        | Ref                               | Ref                               |
|                         |                            | ART      | 150,881                   | 33       | 0.87 (0.61-1.24)                           | 0.82 (0.57-1.18)                  | 0.81 (0.56-1.17)                  |
| Cerebrovascular disease | 1988-1997                  | Non-ART  | 14,625,995                | 7,231    | Ref                                        | Ref                               | Ref                               |
|                         |                            | ART      | 149,612                   | 124      | 1.14 (0.95-1.37)                           | 1.14 (0.95-1.37)                  | 1.12 (0.93-1.36)                  |
|                         | 1998-2007                  | Non-ART  | 10,439,131                | 4,598    | Ref                                        | Ref                               | Ref                               |
|                         |                            | ART      | 395,338                   | 212      | 1.03 (0.90-1.19)                           | 0.92 (0.80-1.06)                  | 0.93 (0.80-1.07)                  |
|                         | 2008-2017                  | Non-ART  | 3,145,245                 | 1,021    | Ref                                        | Ref                               | Ref                               |
|                         |                            | ART      | 150,856                   | 51       | 0.90 (0.68-1.20)                           | 0.86 (0.64-1.15)                  | 0.85 (0.63-1.13)                  |
| Myocardial Infarction   | 1988-1997                  | Non-ART  | 14,659,365                | 2,389    | Ref                                        | Ref                               | Ref                               |
|                         |                            | ART      | 150,150                   | 35       | 0.86 (0.61-1.20)                           | 0.80 (0.57-1.13)                  | 0.82 (0.58-1.16)                  |
|                         | 1998-2007                  | Non-ART  | 10,457,377                | 895      | Ref                                        | Ref                               | Ref                               |
|                         |                            | ART      | 396,167                   | 56       | 1.02 (0.78-1.35)                           | 0.86 (0.65-1.13)                  | 0.88 (0.66-1.18)                  |
|                         | 2008-2017                  | Non-ART  | 3,147,008                 | 128      | Ref                                        | Ref                               | Ref                               |
|                         |                            | ART      | 150,932                   | 6        | 0.53 (0.23-1.22)                           | 0.52 (0.22-1.18)                  | 0.49 (0.21-1.14)                  |
| Stroke                  | 1988-1997                  | Non-ART  | 14,635,493                | 5,752    | Ref                                        | Ref                               | Ref                               |
|                         |                            | ART      | 149,792                   | 90       | 1.03 (0.83-1.27)                           | 1.03 (0.83-1.27)                  | 1.01 (0.81-1.26)                  |
|                         | 1998-2007                  | Non-ART  | 10,444,480                | 3,436    | Ref                                        | Ref                               | Ref                               |
|                         |                            | ART      | 395,522                   | 170      | 1.09 (0.93-1.27)                           | 0.96 (0.82-1.12)                  | 0.98 (0.83-1.15)                  |

|                      |           |         |            |       |                  |                  |                  |
|----------------------|-----------|---------|------------|-------|------------------|------------------|------------------|
|                      | 2008-2017 | Non-ART | 3,145,911  | 704   | Ref              | Ref              | Ref              |
|                      |           | ART     | 150,877    | 38    | 0.94 (0.67-1.31) | 0.89 (0.64-1.24) | 0.87 (0.62-1.22) |
| Cardiomyopathy       | 1988-1997 | Non-ART | 14,665,334 | 947   | Ref              | Ref              | Ref              |
|                      |           | ART     | 150,244    | 8     | 0.60 (0.30-1.22) | 0.60 (0.30-1.22) | 0.53 (0.25-1.14) |
|                      | 1998-2007 | Non-ART | 10,458,177 | 558   | Ref              | Ref              | Ref              |
|                      |           | ART     | 396,239    | 25    | 0.95 (0.63-1.44) | 0.92 (0.61-1.39) | 0.94 (0.62-1.44) |
|                      | 2008-2017 | Non-ART | 3,146,809  | 213   | Ref              | Ref              | Ref              |
|                      |           | ART     | 150,924    | 10    | 0.82 (0.43-1.57) | 0.84 (0.44-1.61) | 0.81 (0.42-1.55) |
| Heart failure        | 1988-1997 | Non-ART | 14,663,146 | 1,566 | Ref              | Ref              | Ref              |
|                      |           | ART     | 150,195    | 21    | 0.82 (0.53-1.27) | 0.77 (0.50-1.20) | 0.80 (0.51-1.25) |
|                      | 1998-2007 | Non-ART | 10,457,464 | 801   | Ref              | Ref              | Ref              |
|                      |           | ART     | 396,284    | 31    | 0.75 (0.52-1.08) | 0.66 (0.46-0.95) | 0.68 (0.47-0.99) |
|                      | 2008-2017 | Non-ART | 3,146,862  | 192   | Ref              | Ref              | Ref              |
|                      |           | ART     | 150,929    | 13    | 1.24 (0.69-2.20) | 1.25 (0.70-2.24) | 1.26 (0.70-2.27) |
| Pulmonary embolism   | 1988-1997 | Non-ART | 14,651,391 | 3,014 | Ref              | Ref              | Ref              |
|                      |           | ART     | 150,139    | 22    | 0.63 (0.41-0.97) | 0.62 (0.41-0.95) | 0.62 (0.40-0.95) |
|                      | 1998-2007 | Non-ART | 10,449,934 | 2,282 | Ref              | Ref              | Ref              |
|                      |           | ART     | 395,984    | 88    | 1.07 (0.86-1.33) | 0.99 (0.80-1.23) | 1.00 (0.80-1.25) |
|                      | 2008-2017 | Non-ART | 3,145,813  | 680   | Ref              | Ref              | Ref              |
|                      |           | ART     | 150,893    | 32    | 1.15 (0.80-1.66) | 1.08 (0.75-1.57) | 1.09 (0.75-1.57) |
| Deep vein thrombosis | 1988-1997 | Non-ART | 14,622,159 | 6,325 | Ref              | Ref              | Ref              |
|                      |           | ART     | 149,780    | 76    | 0.94 (0.74-1.18) | 0.98 (0.78-1.24) | 0.97 (0.76-1.22) |
|                      | 1998-2007 | Non-ART | 10,430,809 | 5,960 | Ref              | Ref              | Ref              |
|                      |           | ART     | 395,288    | 228   | 1.06 (0.92-1.21) | 0.96 (0.84-1.10) | 0.92 (0.80-1.06) |
|                      | 2008-2017 | Non-ART | 3,143,961  | 1,623 | Ref              | Ref              | Ref              |
|                      |           | ART     | 150,781    | 92    | 1.22 (0.98-1.52) | 1.19 (0.96-1.48) | 1.17 (0.94-1.45) |

<sup>a</sup> Adjusted for age and parity, polycystic ovarian syndrome, chronic hypertension, diabetes, year of start of follow-up in addition to country in the pooled model.

<sup>b</sup> Adjusted for age and parity, polycystic ovarian syndrome, chronic hypertension, diabetes, year of start of follow-up, country in the pooled model, in addition to tobacco use and body-mass index.
