# Supplementary material for: Maternal Risk of Cardiovascular Disease After Use of Assisted Reproductive Technologies
Source: PubMed Central journal article supplement (PMC10413220; doi:10.1001/jamacardio.2023.2324), 2023-08-09
Supplement: jamacardiol-e232324-s002.pdf [file jamacardiol-e232324-s002.pdf]

## Data Sharing Statement

Magnus. Maternal Risk of Cardiovascular Disease After Use of Assisted Reproductive Technologies. *JAMA Cardiol.* Published August 09, 2023. doi:10.1001/jamacardio.2023.2324

### Data

**Data available:** No

### Additional Information

**Explanation for why data not available:** Individual level data will can't be made available for privacy reason according to national laws.
